# Supplementary material
Source: PubMed Central journal article supplement (PMC5658254)
Supplement: NIHMS895543-supplement-1.pdf [file NIHMS895543-supplement-1.pdf]

## Supplementary Information

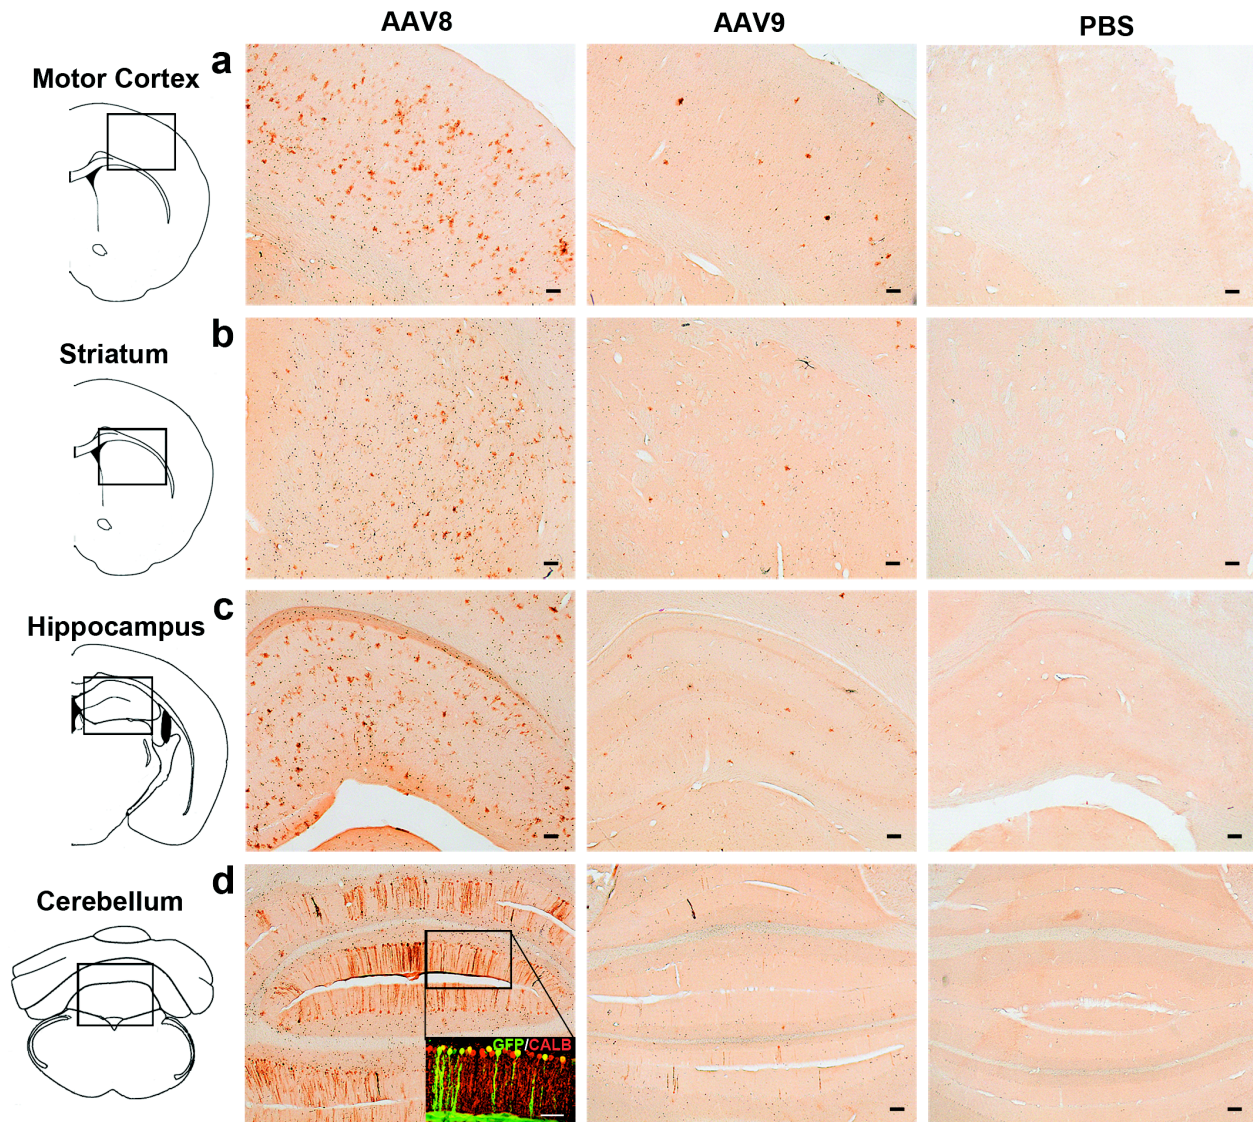

**S1 Fig. Representative coronal sections through the brains of AAV treated guinea pigs shows GFP expression throughout.** Sections through the motor cortex (a), striatum (b), hippocampus, (c) and cerebellum (d) show GFP expression in AAV8 treated animals and AAV9 treated animals. GFP expression was absent in the PBS treated animal. Co-labeling revealed that GFP expression in the cerebellum was within Purkinje cells due to co-expression with the marker calbindin (d, inset). Scale bars =100µm

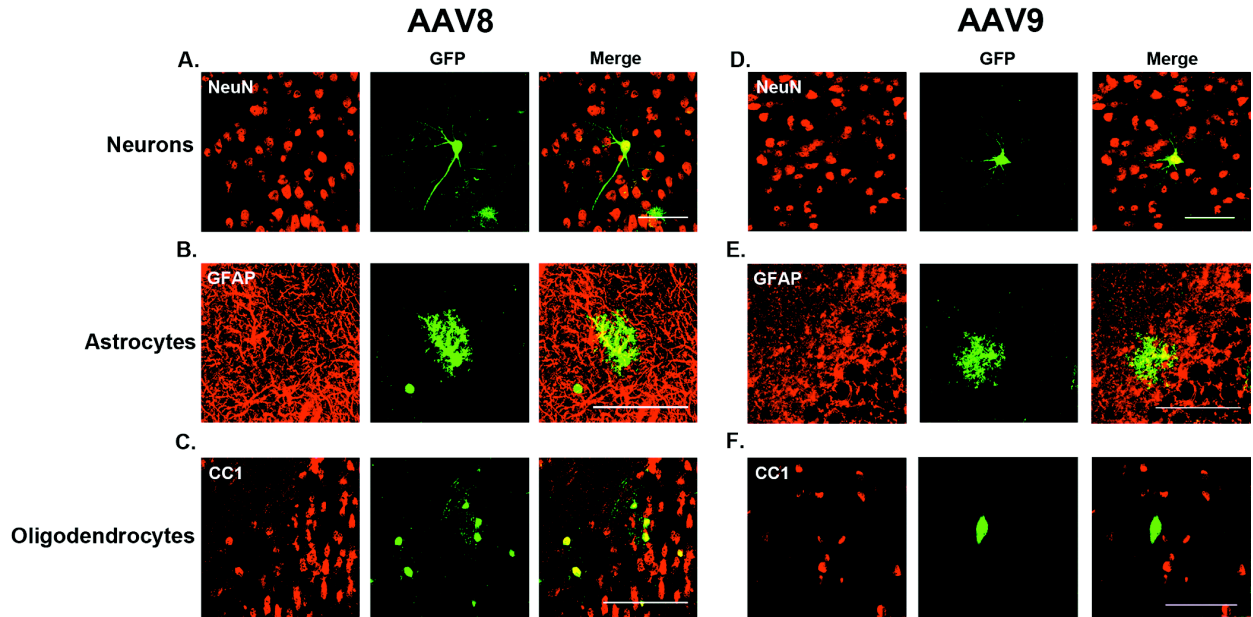

**S2 Fig. AAV8 targets neurons, astrocytes and oligodendrocytes in the guinea pig brain.**

(a) Co-labeling brain sections (motor cortex) with the neuron mark NeuN (red) indicates GFP expression (green) in neurons. (b) An example of a GFP positive cell is shown co-localizing with the astrocyte marker GFAP (red) (hippocampus). (c) GFP expression was also noted in mature oligodendrocytes as indicated by co-localization with CC1 (red) (striatum). (d-f) show GFP expression in neurons and astrocytes from the brains of AAV9 treated animals. Scale bars =100 $\mu$ m

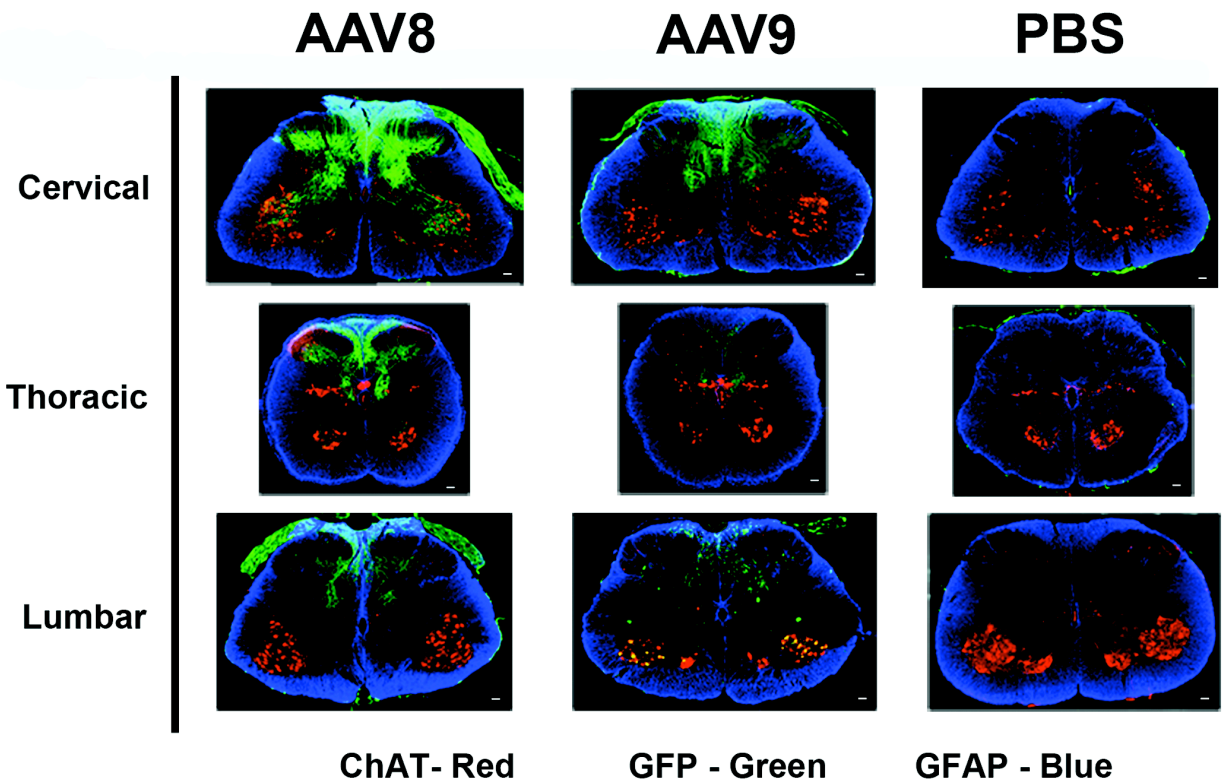

**S3 Fig. Spinal cords indicate AAV transduction of dorsal root ganglia and spinal motor neurons.** Sections from AAV8 treated spinal cords show labeling of GFP positive fibers in the dorsal roots, dorsal grey matter and dorsomedial white matter indicating DRG neuron transduction. AAV9 treated tissues show a less GFP labeling of DRG fibers, but also show targeting of lower motor neurons (ChAT) in lumbar spinal cord. No GFP is detected in sections from a PBS treated animal. Scale bars =100 $\mu$ m

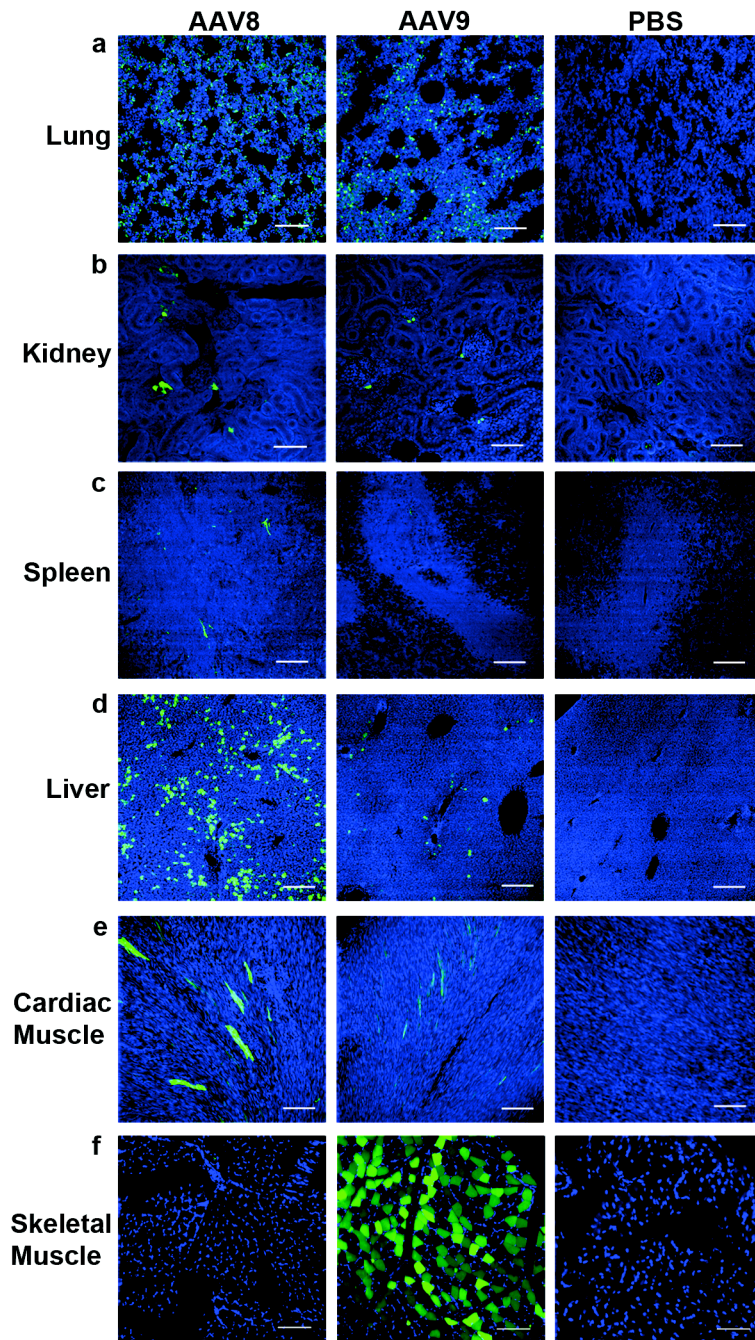

**S4 Fig. Sporadic GFP expression is found in multiple AAV treated guinea pig tissues.**

GFP expression was most abundant in lungs (a) and liver (d) from AAV8 treated animals and from skeletal muscle of AAV9 treated animals (f). GFP is shown in green and the nuclear marker DAPI is shown in blue. Scale bars =100 $\mu$ m

**S1 Table. Antibodies used in this study**

| Antibody                                             | Source                                      | Catalog #   | Dilution |       |           |
|------------------------------------------------------|---------------------------------------------|-------------|----------|-------|-----------|
|                                                      |                                             |             | Gut      | CNS   | Periphery |
| <b>Primary Antibodies</b>                            |                                             |             |          |       |           |
| Goat anti-Calretinin                                 | Swant, Marly, Switzerland                   | CG1         | 1:200    |       |           |
| Rabbit anti-VIP (Vasoactive Intestinal Peptide)      | Abcam, Cambridge, MA, USA                   | ab43841     | 1:200    |       |           |
| Goat anti-nNOS (neuronal Nitric Oxide Synthase)      | Abcam, Cambridge, MA, USA                   | ab1376      | 1:200    |       |           |
| Mouse anti HuD/C                                     | Thermo Fisher, Waltham, MA, USA             | A-21271     | 1:50     |       |           |
| Rabbit anti-Calbindin D-28K                          | Millipore, Temecula, CA, USA                | ab1178      | 1:200    | 1:400 |           |
| Goat anti-ChAT (Choline Acetyltransferase)           | Millipore, Temecula, CA, USA                | ab144P      | 1:50     | 1:50  |           |
| Rabbit anti-S100 Ab-2                                | Thermo Fisher, Waltham, MA, USA             | RB-044-A0   | 1:200    | 1:500 |           |
| Chicken anti-GFAP (Glia Fibrillary Acidic Protein)   | Abcam, Cambridge, MA, USA                   | ab4674      |          | 1:500 |           |
| Mouse anti-NeuN (neuronal nuclei)                    | Millipore, Temecula, CA, USA                | MAB377      |          | 1:50  |           |
| Mouse anti-CC-1 (APC)                                | Novus Biologicals, Littleton, CO, USA       | NB600-1021  |          | 1:400 |           |
| Chicken anti-GFP (Green Fluorescent Protein)         | Abcam, Cambridge, MA, USA                   | ab13970     | 1:200    | 1:500 | 1:500     |
| <b>Secondary Antibodies</b>                          |                                             |             |          |       |           |
| Donkey anti-chicken Alexa Fluor 488                  | Jackson ImmunoResearch, West Grove, PA, USA | 703-545-155 | 1:200    | 1:500 | 1:500     |
| Donkey anti-chicken Cy3-conjugated                   | Jackson ImmunoResearch, West Grove, PA, USA | 703-165-155 | 1:200    |       |           |
| Donkey anti-goat Cy3-conjugated                      | Jackson ImmunoResearch, West Grove, PA, USA | 705-165-147 | 1:200    |       |           |
| Donkey anti-goat Alexa Fluor 647                     | Jackson ImmunoResearch, West Grove, PA, USA | 705-605-147 | 1:200    |       |           |
| Donkey anti-mouse Alexa Fluor 647                    | Jackson ImmunoResearch, West Grove, PA, USA | 715-605-150 | 1:200    |       |           |
| Donkey anti-mouse Cy3-conjugated                     | Jackson ImmunoResearch, West Grove, PA, USA | 715-165-150 | 1:200    | 1:500 |           |
| Donkey anti-rabbit Alexa Fluor 647                   | Jackson ImmunoResearch, West Grove, PA, USA | 711-605-152 | 1:200    | 1:500 |           |
| Donkey anti-rabbit Cy3-conjugated                    | Jackson ImmunoResearch, West Grove, PA, USA | 711-165-152 | 1:200    |       |           |
| Donkey anti-chicken Biotin-SP-conjugated (chromagen) | Jackson ImmunoResearch, West Grove, PA, USA | 703-065-155 |          | 1:500 |           |

**Supplementary Table 2) Guinea pig ENS cell counts**

| <b>Structure</b>                | <b>Region</b> | <b>Total HuD+ Neurons</b> | <b>Total GFP+ Neurons</b> | <b>Number of animals</b> | <b>Range of GFP+ cells/animal</b> |
|---------------------------------|---------------|---------------------------|---------------------------|--------------------------|-----------------------------------|
| <b><i>Myenteric Plexus</i></b>  |               |                           |                           |                          |                                   |
| <b>AAV8</b>                     | Stomach       | 618                       | 53                        | 2                        | 2-51                              |
|                                 | Duodenum      | 641                       | 102                       | 2                        | 38-64                             |
|                                 | Jejunum       | 660                       | 70                        | 2                        | 27-43                             |
|                                 | Ileum         | 623                       | 40                        | 2                        | 16-24                             |
|                                 | Cecum         | 848                       | 26                        | 2                        | 13                                |
|                                 | Colon         | 739                       | 49                        | 2                        | 11-38                             |
| <b>AAV9</b>                     | Stomach       | 624                       | 11                        | 2                        | 3-8                               |
|                                 | Duodenum      | 637                       | 35                        | 2                        | 15-20                             |
|                                 | Jejunum       | 642                       | 23                        | 2                        | 8-15                              |
|                                 | Ileum         | 711                       | 11                        | 2                        | 5-6                               |
|                                 | Cecum         | 625                       | 18                        | 2                        | 8-10                              |
|                                 | Colon         | 667                       | 25                        | 2                        | 11-14                             |
| <b><i>Submucosal Plexus</i></b> |               |                           |                           |                          |                                   |
| <b>AAV8</b>                     | Duodenum      | 450                       | 62                        | 2                        | 19-43                             |
|                                 | Jejunum       | 426                       | 121                       | 2                        | 48-73                             |
|                                 | Ileum         | 401                       | 95                        | 2                        | 15-80                             |
|                                 | Cecum         | 494                       | 66                        | 2                        | 3-63                              |
|                                 | Colon         | 482                       | 111                       | 2                        | 50-61                             |
| <b>AAV9</b>                     | Duodenum      | 319                       | 17                        | 2                        | 7-10                              |
|                                 | Jejunum       | 387                       | 3                         | 2                        | 1-2                               |
|                                 | Ileum         | 555                       | 11                        | 2                        | 5-6                               |
|                                 | Cecum         | 465                       | 13                        | 2                        | 3-1                               |
|                                 | Colon         | 536                       | 15                        | 2                        | 6-9                               |
